# Supplementary material
Source: PubMed Central journal article supplement (PMC7050394)
Supplement: NIHMS1060301-supplement-Supp_figS3.pdf [file NIHMS1060301-supplement-Supp_figS3.pdf]

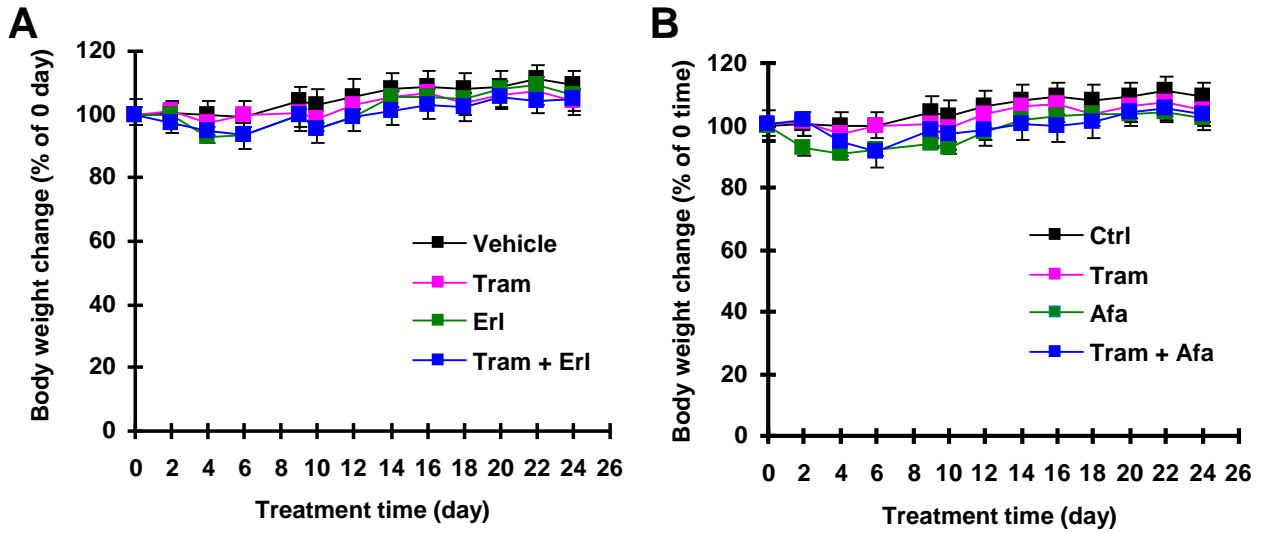

**Fig. 7. The combination of trametinib combined with erlotinib (A) or afatinib (B) does not alter mouse body weights.** PC-9/AR xenografts were treated as described in Fig. 7. Mouse body weights were recorded once every two days.
